# Supplementary material for: Integrated Information Increases with Fitness in the Evolution of Animats
Source: PLOS journal article supplement (doi:10.1371/journal.pcbi.1002236), 2011-10-20
Supplement: S2 (10.1371/journal.pcbi.1002236.s002) [file journal.pcbi.1002236.s002]

301 Moved Permanently

# Moved Permanently

The document has moved here.

---

Apache Server at www.ploscompbiol.org Port 80
